# Supplementary material for: Sequential adsorption of multiple CO molecules on Au10− and Au9Zn− triangular clusters: the crucial role of a single atomic impurity
Source: Royal Society of Chemistry journal article supplement (doi:10.1039/d5cp00193e), 2025-01-01
Supplement: d5cp00193e1.pdf [file d5cp00193e1.pdf]

Electronic Supplementary Information (ESI) for Physical Chemistry Chemical Physics.

**Sequential adsorption of up to six CO molecules on  $\text{Au}_{10}^-$  and  $\text{Au}_9\text{Zn}^-$  triangular clusters. The crucial role of a single atomic impurity**

Eva M. Fernández (emfernandez@fisfun.uned.es)

*Departamento de Física Fundamental, Universidad Nacional de Educación a Distancia, Madrid, Spain*

and

Luis C. Balbás

*Departamento de Física Teórica, Universidad de Valladolid, 47011 Valladolid, Spain*

Contents:

- 1) Figure S1. Some isomers of  $\text{Au}_{10}(\text{CO})_n^-$  and  $\text{Au}_9\text{Zn}^-(\text{CO})_n^-$  compounds with excess energy less than 0.1 eV over the ground state
- 2) Table S1. Discussion of non-local van der Waals correlation effects on the global and local minimum energy configurations of the  $\text{Au}_{10}(\text{CO})_n^-$  and  $\text{Au}_9\text{Zn}^-(\text{CO})_n^-$  compounds in Figure S1.
- 3) Table S2. Angles Au-C-O for all CO molecules adsorbed in the complexes of Figure 1 of the main text.
- 4) Table S3. Angle  $\alpha_2$  formed by the three corners Au atoms and the plane containing the Au-C-O molecule for each of the compounds shown of Figure 1 of the main text.
- 5) Table S4. Excess/defect of charge (per CO molecule) for CO, C, O, and Zn atoms.
- 6) The xyz coordinates of all the minimum energy structures given in Figure-1 and Figure-1S.

1)  $\text{Au}_{10}(\text{CO})_n^-$  and  $\text{Au}_9\text{Zn}^-(\text{CO})_n^-$  isomers.

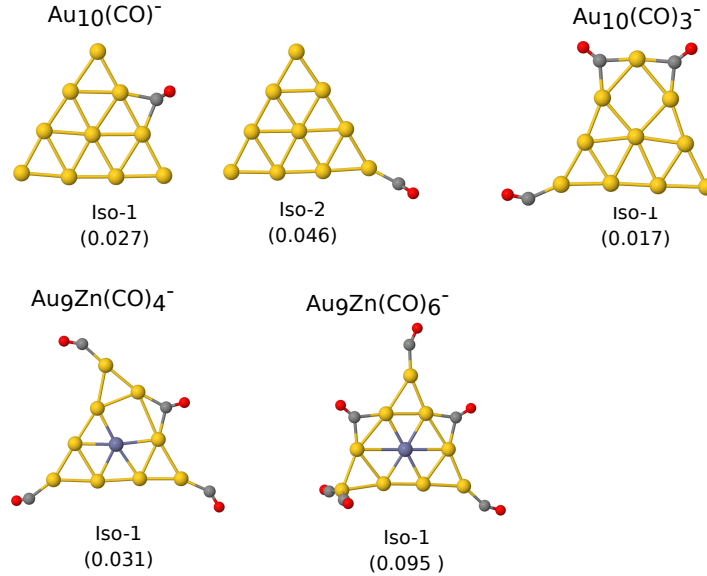

Figure S1: Some isomers of  $\text{Au}_{10}(\text{CO})_n^-$  and  $\text{Au}_9\text{Zn}^-(\text{CO})_n^-$  compounds with excess energy (below in parenthesis) less than 0.15 eV over the ground state given of Figure 1 of the main text. Note that the isomer  $\text{Au}_{10}(\text{CO})^-$  with CO adsorbed on top site has 0.046 eV excess energy. For  $\text{Au}_9\text{Zn}(\text{CO})^-$  all the isomers with CO in bridge sites have excess energy larger than 0.10 eV and are not included in this Figure-S1. All the compounds in this Figure have spin multiplicity 1 (2) corresponding to an even (odd) number of electrons.

2) **non-local van der Waals dispersion effects.**

Only after the work of Langreth, Lundqvist, and coworkers [1] the non-local dispersion correlations have been incorporated selfconsistently in DFT. These authors demonstrate that the vdW interaction can be expressed by a nonlocal functional depending only on the electron density. After that work, numerous efforts have been developed to include vdW forces within DFT [2,3,4]. Dion et al. [1] proposed to divide the exchange-correlation (xc) energy in three parts:

$$E_{xc}[n] = E_x^{GGA}[n] + E_c^{LDA}[n] + E_c^{nl}[n],$$

where  $E_x^{GGA}[n]$  is the exchange energy corresponding to the chosen generalized gradient approximation (GGA) functional,  $E_c^{LDA}[n]$  is the local density approximation (LDA) to the correlation energy, and  $E_c^{nl}[n]$  is a nonlocal contribution to the correlation energy which contains the dispersion interaction.

Two different flavours of the Dion vdW-DF xc-functional have been chosen for the present test, the DRSL and the KBM ones. In the original work of Dion et al.[1] (DRSL functional), the exchange part is described through the GGA exchange functional of Zhang and Yang [5]. Instead, the KBM functional proposed by Klimes, Bowler, and Michaelides [6] uses the so-called optB88 exchange functional, which is a modification of the B88 exchange functional of Becke [7]. We have used these vdW-functionals in previous works concernig gold and mercury clusters [8].

| Compound                              | isomer | RPBE  | DRSL  | KBM   |
|---------------------------------------|--------|-------|-------|-------|
| $\text{Au}_{10}(\text{CO})^-$         | iso-1  | 0.026 | 0.066 | 0.003 |
|                                       | iso-2  | 0.046 | 0.081 | 0.127 |
| $\text{Au}_{10}(\text{CO})_3^-$       | iso-1  | 0.017 | 0.023 | 0.061 |
| $\text{Au}_9\text{Zn}(\text{CO})_4^-$ | iso-1  | 0.031 | 0.032 | 0.045 |
| $\text{Au}_9\text{Zn}(\text{CO})_6^-$ | iso-1  | 0.095 | 0.114 | 0.067 |

TABLE S1: Comparison of the difference in total energy (in eV) between the compounds of Figure S1 above and the corresponding minimum energy configurations shown in Figure 1 of the main text, for the RPBE functional and two PBE plus non-local van der Waals correlation functionals, namely, DRSL [1] and KBM [6].

In Table S1 are presented the self-consistently calculated differences between the total energies (in eV) of those isomers in Figure S1 above and the corresponding minimum energy configurations given in Figure 1 of the main text. No change of the initial CO adsorption configurations occurs after the forces minimization process, but only slight changes in the bond lengths. The ground state adsorption configuration predicted by the RPBE xc-functional remains for the calculations with the more sophisticated (and expensive) vdW dispersion functionals. This result gives us confidence in the block RPBE calculations presented in the main text.

3) Angles Au-C-O for all CO molecules adsorbed in the complexes of Figure 1 of the main text.

| Compound                                         | Angle Au-C-O ( $\alpha_1$ ) |               |               |               |               |        |
|--------------------------------------------------|-----------------------------|---------------|---------------|---------------|---------------|--------|
| Au <sub>10</sub> (CO) <sup>-</sup>               | 119.64/141.30               |               |               |               |               |        |
| Au <sub>10</sub> (CO) <sub>2</sub> <sup>-</sup>  | 137.84/133.94               | 137.81/133.95 |               |               |               |        |
| Au <sub>10</sub> (CO) <sub>3</sub> <sup>-</sup>  | 136.25/135.27               | 136.55/135.28 | 130.48/131.42 |               |               |        |
| Au <sub>10</sub> (CO) <sub>4</sub> <sup>-</sup>  | 136.60/134.86               | 134.79/137.06 | 131.62/139.01 | 165.42        |               |        |
| Au <sub>10</sub> (CO) <sub>5</sub> <sup>-</sup>  | 134.04/137.97               | 134.12/137.86 | 134.73/134.87 | 154.83        | 154.58        |        |
| Au <sub>10</sub> (CO) <sub>6</sub> <sup>-</sup>  | 136.40/135.46               |               | 134.01/136.85 | 159.47        | 157.61        | 168.80 |
| Au <sub>9</sub> Zn(CO) <sup>-</sup>              | 141.23                      |               |               |               |               |        |
| Au <sub>9</sub> Zn(CO) <sub>2</sub> <sup>-</sup> | 141.55                      | 141.54        |               |               |               |        |
| Au <sub>9</sub> Zn(CO) <sub>3</sub> <sup>-</sup> | 141.14                      | 140.99        | 140.82        |               |               |        |
| Au <sub>9</sub> Zn(CO) <sub>4</sub> <sup>-</sup> | 140.98                      | 139.32        | 143.18        | 135.43        |               |        |
| Au <sub>9</sub> Zn(CO) <sub>5</sub> <sup>-</sup> | 156.10                      | 175.50        | 149.44        | 139.95/136.71 | 141.61/134.36 |        |
| Au <sub>9</sub> Zn(CO) <sub>6</sub> <sup>-</sup> | 155.34                      | 179.24        | 146.54        | 130.82/120.74 | 140.63/134.28 | 140.33 |

TABLE S2: Angles Au-C-O ( $\alpha_1$ ) formed by the CO molecules with Au atoms of the compounds of Figure 1 of the main text. For those CO molecules bridging two Au atoms are given the corresponding two  $\alpha_1$  angles.

4) Angle  $\alpha_2$  formed by the three corners Au atoms and the plane containing the Au-C-O molecule for each of the compounds shown of Figure 1 of the main text.

| The angle $\alpha_2$ between the Au-C-O plane and that of gold substrate |           |           |           |           |            |       |
|--------------------------------------------------------------------------|-----------|-----------|-----------|-----------|------------|-------|
| Au <sub>10</sub> (CO) <sup>-</sup>                                       | 0.99/1.00 |           |           |           |            |       |
| Au <sub>10</sub> (CO) <sub>2</sub> <sup>-</sup>                          | 0.13/0.13 | 0.24/0.21 |           |           |            |       |
| Au <sub>10</sub> (CO) <sub>3</sub> <sup>-</sup>                          | 0.25/0.24 | 0.13/0.10 | 0.22/0.21 |           |            |       |
| Au <sub>10</sub> (CO) <sub>4</sub> <sup>-</sup>                          | 0.48/0.55 | 0.60/0.66 | 0.45/0.43 | 1.63      |            |       |
| Au <sub>10</sub> (CO) <sub>5</sub> <sup>-</sup>                          | 0.08/0.07 | 0.20/0.15 | 0.53/0.53 | 0.21      | 1.38       |       |
| Au <sub>10</sub> (CO) <sub>6</sub> <sup>-</sup>                          | 2.27/2.39 | 1.31/1.31 | 1.16/1.03 | 2.75      | 1.48       | 85.40 |
| Au <sub>9</sub> Zn(CO) <sup>-</sup>                                      | 85.41     |           |           |           |            |       |
| Au <sub>9</sub> Zn(CO) <sub>2</sub> <sup>-</sup>                         | 84.40     | 81.45     |           |           |            |       |
| Au <sub>9</sub> Zn(CO) <sub>3</sub> <sup>-</sup>                         | 86.43     | 82.26     | 88.90     |           |            |       |
| Au <sub>9</sub> Zn(CO) <sub>4</sub> <sup>-</sup>                         | 81.56     | 74.21     | 80.16     | 70.94     |            |       |
| Au <sub>9</sub> Zn(CO) <sub>5</sub> <sup>-</sup>                         | 3.19      | 8.36      | 0.65      | 0.90/0.88 | 2.2/2.08   |       |
| Au <sub>9</sub> Zn(CO) <sub>6</sub> <sup>-</sup>                         | 5.46      | 39.74     | 3.34      | 3.01/1.96 | 1.92/17.36 | 71.05 |

TABLE S3: Angle  $\alpha_2$  formed by the plane of the Au-C-O trimer with the plane formed by the three Au corner atoms of the compounds of Figure 1 of the main text. For those CO bridging two Au atoms are given the corresponding two  $\alpha_2$  angles.

## 5) Excess/defect of charge (per CO molecule) for CO, C, O, and Zn atoms.

| Bridge (b) and top (t) bonding, and excess/defect of charge (per CO molecule) for CO, C, O, and Zn |         |                     |                    |                    |                     |
|----------------------------------------------------------------------------------------------------|---------|---------------------|--------------------|--------------------|---------------------|
| Compound                                                                                           | (b,t)   | $\Delta(\text{CO})$ | $\Delta(\text{C})$ | $\Delta(\text{O})$ | $\Delta(\text{Zn})$ |
| $\text{Au}_{10}(\text{CO})^-$                                                                      | (1,0)   | 0.241               | -0.573             | 0.814              |                     |
| $\text{Au}_{10}(\text{CO})_2^-$                                                                    | (2,0)   | 0.252               | -0.564             | 0.816              |                     |
| $\text{Au}_{10}(\text{CO})_3^-$                                                                    | (3,0)   | 0.238               | -0.570             | 0.808              |                     |
| $\text{Au}_{10}(\text{CO})_4^-$                                                                    | (3*,1)  | 0.210               | -0.598             | 0.807              |                     |
| $\text{Au}_{10}(\text{CO})_5^-$                                                                    | (3,2)   | 0.204               | -0.594             | 0.798              |                     |
| $\text{Au}_{10}(\text{CO})_6^-$                                                                    | (3,3*)  | 0.189               | -0.613             | 0.803              |                     |
| $\text{Au}_9\text{Zn}(\text{CO})^-$                                                                | (0,1)   | 0.147               | -0.682             | 0.829              | -0.849              |
| $\text{Au}_9\text{Zn}(\text{CO})_2^-$                                                              | (0,2)   | 0.144               | -0.688             | 0.833              | -0.842              |
| $\text{Au}_9\text{Zn}(\text{CO})_3^-$                                                              | (0,3)   | 0.150               | 0.672              | 0.822              | -0.839              |
| $\text{Au}_9\text{Zn}(\text{CO})_4^-$                                                              | (0,4*)  | 0.153               | -0.671             | 0.824              | -0.822              |
| $\text{Au}_9\text{Zn}(\text{CO})_5^-$                                                              | (2*,3)  | 0.186               | -0.636             | 0.823              | -0.717              |
| $\text{Au}_9\text{Zn}(\text{CO})_6^-$                                                              | (3*,3*) | 0.180               | -0.647             | 0.827              | -0.706              |

TABLE S4: In the second column is given the type of bonding, bridge (b) or on top (t), of the CO molecules. The asterisk (\*) indicates that the last CO binds to highly coordinated gold (Au) atoms. In columns third to sixth, the excess or deficit of nominal charge per molecule is given for CO, C, O, and Zn atoms, respectively.

## 6) The xyz coordinates of all the minimum energy structures given in Figure-1 and Figure-1S.

## REFERENCES

1. M.Dion, H. Rydberg, E. Schröder, D. C: Langreth and B. I. Lundqvist, Phys. Rev. Lett., 2004, 92, 2464001.
2. O. A. Vydrov and T. Von Voorhis, Phys. Rev. Lett., 2009, 103, 063004.
3. K. Lee, E. D. Murray, L. Kong, B. I. Lundqvist and D. C. Langreth, Phys. Rev. B: Condens. Matter Mater. Phys., 2010, 82, 081101.
4. O. A. Vydrov and T. Van Voorhis, J. Chem. Phys., 2010, 132, 164113.
5. Y. Zhang and W. Yang, Phys. Rev. Lett., 1998, 80, 890.
6. J. Klimes, D. R. Bowler and A. Michaelides, J. Phys.: Condens. Matter, 2010, 22, 022201.
7. A. D. Becke, Phys. Rev. A: At., Mol., Opt. Phys., 1988, 38, 3098.
8. E. M. Fernández and L. C. Balbás, Phys. Chem. Chem. Phys., 2011, **13**, 20863-20870

Au10(CO)<sup>-</sup> GS  
12

|    |           |           |           |
|----|-----------|-----------|-----------|
| O  | -2.564717 | 5.292986  | 0.113609  |
| C  | -1.770339 | 4.403424  | 0.107772  |
| Au | -0.086138 | 0.055222  | -0.055300 |
| Au | -2.878259 | -0.005180 | -0.306862 |
| Au | -1.376822 | -2.406539 | -0.338637 |
| Au | 1.263202  | -2.391491 | -0.098701 |
| Au | 2.734580  | 0.030888  | 0.193102  |
| Au | -4.088681 | -2.382274 | -0.585248 |
| Au | 3.977813  | -2.337887 | 0.149807  |
| Au | -1.656614 | 2.367640  | -0.030107 |
| Au | 1.443272  | 2.361514  | 0.228477  |
| Au | 0.305274  | 4.843383  | 0.294987  |

Au10(CO)<sup>-</sup> isomer 1  
12

|    |           |           |           |
|----|-----------|-----------|-----------|
| O  | 4.363776  | 2.363477  | -1.211385 |
| C  | 3.566356  | 1.895705  | -0.459363 |
| Au | -0.117961 | -0.097262 | -0.273451 |
| Au | -2.852619 | 0.105438  | -0.018636 |
| Au | -1.449515 | -2.505464 | -0.165921 |
| Au | 1.240462  | -2.495234 | -0.306716 |
| Au | 2.744370  | -0.086112 | -0.324869 |
| Au | -4.143433 | -2.274898 | -0.003857 |
| Au | 3.975998  | -2.442123 | -0.363017 |
| Au | -1.363791 | 2.349792  | -0.036004 |
| Au | 1.469856  | 2.281861  | -0.193850 |
| Au | 0.190744  | 4.602219  | 0.027774  |

Au10(CO)<sup>-</sup> isomer 2  
12

|    |           |           |           |
|----|-----------|-----------|-----------|
| O  | 6.729420  | -3.599151 | 0.093739  |
| C  | 5.921307  | -3.070928 | -0.574015 |
| Au | 0.042588  | 0.040550  | -0.046110 |
| Au | -2.734338 | 0.012956  | -0.024255 |
| Au | -1.243337 | -2.400544 | -0.422569 |
| Au | 1.447146  | -2.311653 | -0.409974 |
| Au | 2.799298  | 0.153502  | -0.040556 |
| Au | -3.962365 | -2.360847 | -0.387128 |
| Au | 4.156392  | -2.144225 | -0.636657 |
| Au | -1.447540 | 2.352555  | 0.328629  |
| Au | 1.421394  | 2.434742  | 0.306382  |
| Au | -0.098937 | 4.660228  | 0.672608  |

Au10(CO)<sub>2</sub><sup>-</sup> GS

14

|    |             |             |             |
|----|-------------|-------------|-------------|
| C  | 1.89748578  | 4.82265423  | -0.10099869 |
| O  | 2.79718535  | 5.60902325  | -0.09580500 |
| O  | -3.24648535 | 5.30615076  | -0.09352760 |
| C  | -2.27249685 | 4.61401082  | -0.09790071 |
| Au | 0.02447868  | 0.48237315  | -0.12219478 |
| Au | -2.74618847 | 0.05449805  | -0.11577335 |
| Au | -1.16078576 | -2.22319005 | -0.13322123 |
| Au | 1.46642679  | -2.09094516 | -0.14205408 |
| Au | 2.82472069  | 0.33080024  | -0.13119654 |
| Au | -3.86692886 | -2.38300696 | -0.12461453 |
| Au | 4.17476430  | -1.98761403 | -0.15129359 |
| Au | -1.96452781 | 2.56438398  | -0.10685624 |
| Au | 1.79645174  | 2.75107616  | -0.11347236 |
| Au | -0.19464982 | 4.86049993  | -0.09979526 |

Au10(CO)<sub>3</sub><sup>-</sup> GS

16

|    |             |             |             |
|----|-------------|-------------|-------------|
| C  | 0.21240644  | -3.73879850 | 0.05895336  |
| O  | 0.54647264  | -4.89273307 | 0.09383222  |
| C  | 1.90607066  | 4.87681112  | -0.09508997 |
| O  | 2.71918661  | 5.75262007  | -0.09575142 |
| O  | -3.21288811 | 5.28813141  | -0.19426777 |
| C  | -2.27698694 | 4.54617269  | -0.16552885 |
| Au | 0.11122613  | 0.67826669  | -0.04517736 |
| Au | -2.48644802 | -0.13563778 | -0.07749575 |
| Au | -1.63107630 | -2.86923786 | 0.00147549  |
| Au | 1.34277071  | -2.02245251 | 0.03965283  |
| Au | 2.84554414  | 0.29972231  | 0.01557258  |
| Au | -4.21877633 | -2.18948821 | -0.06637030 |
| Au | 4.10571760  | -2.05202000 | 0.09186566  |
| Au | -2.02991758 | 2.49045368  | -0.12198823 |
| Au | 1.97250556  | 2.80525782  | -0.05352570 |
| Au | -0.18781938 | 4.74174058  | -0.13253366 |

Au10(CO)<sub>3</sub><sup>-</sup> isomer 1  
16

|    |           |           |           |
|----|-----------|-----------|-----------|
| O  | 7.455888  | -1.665443 | -0.372239 |
| C  | 6.338854  | -2.021185 | -0.319945 |
| C  | 1.515253  | 5.178613  | -0.107263 |
| O  | 2.351760  | 6.031487  | -0.096672 |
| O  | -3.641530 | 5.268383  | -0.089066 |
| C  | -2.629025 | 4.632378  | -0.095673 |
| Au | -0.008229 | 0.741020  | -0.153951 |
| Au | -2.715946 | 0.044249  | -0.122318 |
| Au | -0.946136 | -2.106691 | -0.165524 |
| Au | 1.658280  | -1.681887 | -0.208569 |
| Au | 2.823840  | 0.754692  | -0.195253 |
| Au | -3.629757 | -2.477220 | -0.123378 |
| Au | 4.417872  | -1.427797 | -0.254375 |
| Au | -2.169130 | 2.618190  | -0.112886 |
| Au | 1.597298  | 3.100536  | -0.141528 |
| Au | -0.573715 | 5.043394  | -0.099216 |

Au10(CO)<sub>4</sub><sup>-</sup> GS  
18

|    |             |             |             |
|----|-------------|-------------|-------------|
| O  | -7.11647528 | -2.73830959 | 0.18229613  |
| C  | -5.94418306 | -2.77950690 | 0.15465496  |
| C  | 0.35083452  | -3.70238072 | 0.08219110  |
| O  | 0.67437601  | -4.85356220 | 0.09571532  |
| C  | 1.91907490  | 4.96217788  | -0.08496325 |
| O  | 2.71250956  | 5.85735812  | -0.09911732 |
| O  | -3.23635619 | 5.31114101  | -0.09019259 |
| C  | -2.27939643 | 4.59768913  | -0.07364808 |
| Au | 0.15768579  | 0.74920985  | 0.00052250  |
| Au | -2.47280728 | -0.09293121 | 0.03871278  |
| Au | -1.35850939 | -2.57907958 | 0.08066991  |
| Au | 1.47372433  | -1.95222927 | 0.04363559  |
| Au | 2.89900592  | 0.41186407  | -0.00768658 |
| Au | -4.02324588 | -2.35102746 | 0.11061792  |
| Au | 4.21955555  | -1.91506242 | 0.02822895  |
| Au | -1.98431797 | 2.53787329  | -0.02767579 |
| Au | 1.96909883  | 2.90015927  | -0.04913090 |
| Au | -0.18813028 | 4.84276043  | -0.08120021 |

Au10(CO)<sub>5</sub><sup>-</sup> GS  
20

|    |             |             |             |
|----|-------------|-------------|-------------|
| O  | 6.83564871  | -2.89113815 | 0.19339760  |
| C  | 5.66822389  | -3.01914694 | 0.19597300  |
| O  | -7.64800030 | -2.35137182 | -0.00052916 |
| C  | -6.49872680 | -2.59152740 | 0.01928795  |
| C  | -0.40637555 | -3.86952817 | 0.14948058  |
| O  | -0.41500427 | -5.06526776 | 0.18413963  |
| C  | 1.92726568  | 4.60886895  | -0.00205274 |
| O  | 2.79937044  | 5.42599329  | -0.00265629 |
| O  | -3.15225901 | 5.55352150  | -0.09260343 |
| C  | -2.31729745 | 4.69903433  | -0.06476684 |
| Au | -0.28366989 | 0.64491240  | 0.04280456  |
| Au | -2.97155559 | 0.06381872  | 0.01580305  |
| Au | -1.85399735 | -2.40877384 | 0.08870149  |
| Au | 1.06734024  | -2.43048212 | 0.13220962  |
| Au | 2.37567361  | -0.05516881 | 0.09472208  |
| Au | -4.56749929 | -2.13254841 | 0.03829521  |
| Au | 3.79395609  | -2.36850595 | 0.16522234  |
| Au | -2.23451648 | 2.63381218  | -0.02418810 |
| Au | 1.75654065  | 2.54715343  | 0.03322108  |
| Au | -0.19316694 | 4.71023630  | -0.03524323 |

Au10(CO)<sub>6</sub><sup>-</sup> GS  
22

|    |             |             |             |
|----|-------------|-------------|-------------|
| C  | 4.45928442  | 0.67554627  | 0.37431378  |
| O  | 5.52402424  | 1.11752181  | 0.18814121  |
| O  | 6.25019615  | -3.94678394 | 0.36961419  |
| C  | 5.08943598  | -3.77130752 | 0.34445353  |
| O  | -7.76525563 | -1.79291626 | -0.09634894 |
| C  | -6.65193940 | -2.16043254 | -0.08397573 |
| C  | -0.32229023 | -3.87624902 | 0.09048320  |
| O  | -0.08285642 | -5.04832289 | 0.09574004  |
| C  | 1.80061910  | 4.69250672  | 0.09577638  |
| O  | 2.65159245  | 5.53777905  | 0.09173070  |
| O  | -3.28728268 | 5.33224201  | -0.09466850 |
| C  | -2.37989045 | 4.55624337  | -0.04345815 |
| Au | -0.11176492 | 0.60967184  | 0.12205280  |
| Au | -2.77493321 | -0.11723454 | 0.01888866  |
| Au | -2.06890658 | -2.76432757 | 0.03035609  |
| Au | 0.77078077  | -2.09728158 | 0.14757166  |
| Au | 2.59312842  | -0.07686996 | 0.30348009  |
| Au | -4.67403734 | -2.08255110 | -0.04046580 |
| Au | 3.39963067  | -2.75624992 | 0.28613730  |
| Au | -2.20152283 | 2.47866285  | 0.00728956  |
| Au | 1.89633992  | 2.61498547  | 0.17419062  |
| Au | -0.28493782 | 4.66970510  | 0.03102771  |



Au<sub>9</sub>Zn(CO)<sup>-</sup> GS  
12

|    |           |           |           |
|----|-----------|-----------|-----------|
| C  | -5.311432 | -2.991672 | 1.919743  |
| O  | -5.709513 | -3.290820 | 2.983612  |
| Zn | 0.245693  | 0.240610  | -0.036579 |
| Au | 1.416971  | -2.172175 | -0.411594 |
| Au | -1.090151 | -2.109792 | 0.365456  |
| Au | -2.367762 | 0.279928  | 0.765836  |
| Au | 1.608471  | 2.537202  | -0.442707 |
| Au | 2.826959  | 0.252709  | -0.828516 |
| Au | 0.276299  | 4.839345  | -0.021045 |
| Au | -1.104340 | 2.547979  | 0.383566  |
| Au | 4.004662  | -2.140763 | -1.200891 |
| Au | -3.749664 | -2.070977 | 1.021136  |

Au<sub>9</sub>Zn(CO)<sub>2</sub><sup>-</sup> GS  
14

|    |           |           |           |
|----|-----------|-----------|-----------|
| C  | -0.102328 | 6.691382  | -0.299248 |
| O  | -0.193296 | 7.441635  | -1.198489 |
| C  | 5.645835  | -3.251494 | 0.481534  |
| O  | 6.260552  | -3.666866 | 1.392216  |
| Zn | -0.187505 | 0.005285  | 0.053136  |
| Au | 1.176764  | -2.334613 | 0.127857  |
| Au | -1.452607 | -2.362464 | 0.063760  |
| Au | -2.871382 | 0.109528  | 0.003706  |
| Au | 1.237590  | 2.342861  | 0.032980  |
| Au | 2.542981  | 0.056898  | 0.118310  |
| Au | -0.150876 | 4.715568  | 0.124763  |
| Au | -1.515778 | 2.362169  | -0.014357 |
| Au | 3.897733  | -2.338824 | 0.035342  |
| Au | -4.153018 | -2.269003 | 0.011479  |

Au<sub>9</sub>Zn(CO)<sub>3</sub><sup>-</sup> GS  
16

|    |             |             |             |
|----|-------------|-------------|-------------|
| C  | -0.36291358 | 6.57958452  | 1.57570862  |
| O  | -0.46534051 | 7.15436369  | 2.59535922  |
| C  | -5.78765718 | -3.18650733 | -1.25364141 |
| O  | -6.40803253 | -3.29717074 | -2.24534978 |
| C  | 5.72890080  | -3.13258852 | 0.49197392  |
| O  | 6.34379004  | -3.56907487 | 1.39293760  |
| Zn | -0.12912246 | 0.05831546  | 0.16347228  |
| Au | 1.26230422  | -2.25023190 | -0.07624713 |
| Au | -1.35942086 | -2.28310620 | -0.40550593 |
| Au | -2.81299525 | 0.05662447  | -0.14952898 |
| Au | 1.16365194  | 2.36419491  | 0.72713833  |
| Au | 2.55292805  | 0.13009993  | 0.48459583  |
| Au | -0.27606142 | 4.69634027  | 0.83766854  |
| Au | -1.58391979 | 2.32529299  | 0.41681924  |
| Au | 3.99651242  | -2.16677247 | 0.08666789  |
| Au | -4.09383699 | -2.33539061 | -0.54491418 |

Au<sub>9</sub>Zn(CO)<sub>4</sub><sup>-</sup> GS  
18

|    |           |           |           |
|----|-----------|-----------|-----------|
| O  | 3.551584  | 4.110024  | 1.684998  |
| C  | 2.570143  | 3.626762  | 2.118904  |
| C  | -1.226617 | 6.595215  | 1.597849  |
| O  | -1.960903 | 7.256211  | 2.231258  |
| C  | -5.764908 | -3.398292 | -1.216978 |
| O  | -6.201467 | -3.748928 | -2.251074 |
| C  | 5.696655  | -2.921000 | 0.524693  |
| O  | 6.364786  | -3.360591 | 1.385229  |
| Zn | -0.235096 | 0.037700  | 0.407857  |
| Au | 1.228909  | -2.188391 | 0.028723  |
| Au | -1.382516 | -2.376426 | -0.317544 |
| Au | -2.878092 | -0.087852 | 0.077193  |
| Au | 0.993498  | 2.477373  | 1.335460  |
| Au | 2.366814  | 0.219343  | 0.800180  |
| Au | -0.753389 | 4.690495  | 1.147208  |
| Au | -1.703754 | 2.205220  | 0.686744  |
| Au | 3.971465  | -1.899539 | 0.237677  |
| Au | -4.086505 | -2.533007 | -0.466704 |

Au<sub>9</sub>Zn(CO)<sub>4</sub><sup>-</sup> isomer 1  
18

|    |           |           |           |
|----|-----------|-----------|-----------|
| C  | 3.501140  | 2.353564  | 1.243502  |
| O  | 4.680999  | 2.542384  | 1.411112  |
| C  | -1.492190 | 6.806508  | 1.565751  |
| O  | -2.627695 | 7.095864  | 1.499987  |
| C  | -5.553444 | -2.461766 | -1.130980 |
| O  | -6.286246 | -2.397039 | -2.047238 |
| C  | 5.859944  | -3.180782 | 0.442098  |
| O  | 6.396757  | -4.218139 | 0.290304  |
| Zn | 0.177447  | 0.353852  | 0.442972  |
| Au | 1.498255  | -1.939518 | 0.150420  |
| Au | -1.168544 | -1.829147 | -0.179110 |
| Au | -2.417301 | 0.659865  | 0.173675  |
| Au | 1.796877  | 3.480859  | 1.276967  |
| Au | 2.858131  | 0.401164  | 0.780717  |
| Au | -0.114029 | 5.342767  | 1.428677  |
| Au | -0.841372 | 2.715353  | 0.804809  |
| Au | 4.106873  | -2.208611 | 0.425118  |
| Au | -3.959383 | -1.476308 | -0.343624 |

Au<sub>9</sub>Zn(CO)<sub>5</sub><sup>-</sup> GS  
20

|    |           |           |           |
|----|-----------|-----------|-----------|
| C  | 3.185203  | 2.508145  | 1.420417  |
| O  | 4.172493  | 3.075258  | 1.773639  |
| C  | -3.615424 | 2.752738  | 0.183833  |
| O  | -4.517453 | 3.541077  | 0.191764  |
| C  | -0.128362 | 7.134279  | 1.901607  |
| O  | 0.391662  | 8.131183  | 2.242797  |
| C  | -5.427736 | -3.110029 | -1.481066 |
| O  | -6.085794 | -4.030024 | -1.789686 |
| C  | 5.349463  | -3.167248 | 0.422914  |
| O  | 6.449463  | -3.549764 | 0.561936  |
| Zn | -0.169284 | 0.629028  | 0.334614  |
| Au | 1.106033  | -1.589553 | 0.033035  |
| Au | -1.546020 | -1.442143 | -0.413569 |
| Au | -3.377060 | 0.739352  | -0.236992 |
| Au | 1.130883  | 2.820149  | 1.100063  |
| Au | 2.748658  | 0.524817  | 0.843563  |
| Au | 0.001608  | 5.199816  | 1.457299  |
| Au | -1.541049 | 2.884446  | 0.609707  |
| Au | 3.869164  | -1.846036 | 0.463010  |
| Au | -4.215880 | -1.676299 | -0.946780 |

Au<sub>9</sub>Zn(CO)<sub>6</sub><sup>-</sup> GS  
22

|    |           |           |           |
|----|-----------|-----------|-----------|
| O  | 1.035003  | -4.830804 | -0.197556 |
| C  | 1.307636  | -3.787260 | -0.661941 |
| C  | 3.225785  | 2.478141  | 1.106475  |
| O  | 4.270037  | 3.052022  | 1.122857  |
| C  | -3.629706 | 2.725974  | 0.259965  |
| O  | -4.441773 | 3.596959  | 0.369293  |
| C  | -0.300180 | 7.062615  | 2.042126  |
| O  | 0.186106  | 8.056007  | 2.442673  |
| C  | -5.479775 | -3.133221 | -1.477511 |
| O  | -6.187863 | -4.015802 | -1.780841 |
| C  | 5.436272  | -3.089688 | 0.614924  |
| O  | 6.532759  | -3.439111 | 0.843791  |
| Zn | -0.047610 | 0.591295  | 0.145616  |
| Au | 1.100005  | -1.748274 | -0.265276 |
| Au | -1.611375 | -1.348178 | -0.515503 |
| Au | -3.486268 | 0.740619  | -0.239541 |
| Au | 1.169631  | 2.858880  | 0.959308  |
| Au | 2.629134  | 0.482062  | 0.639438  |
| Au | -0.005439 | 5.162202  | 1.506072  |
| Au | -1.503765 | 2.780005  | 0.536962  |
| Au | 3.952164  | -1.786107 | 0.494723  |
| Au | -4.317823 | -1.653561 | -0.955818 |

Au<sub>9</sub>Zn(CO)<sub>6</sub><sup>-</sup> isomer 1  
22

|    |           |           |           |
|----|-----------|-----------|-----------|
| O  | -3.474530 | -0.668225 | -4.929066 |
| C  | -3.811309 | -1.059429 | -3.873730 |
| C  | 3.040416  | 2.342627  | 1.775315  |
| O  | 4.010519  | 2.846469  | 2.251017  |
| C  | -3.591246 | 2.772311  | -0.049125 |
| O  | -4.524060 | 3.521502  | -0.020560 |
| C  | -0.345141 | 6.866066  | 2.567936  |
| O  | 0.097089  | 7.822764  | 3.085856  |
| C  | -4.956819 | -2.494864 | -0.532348 |
| O  | -5.333177 | -2.990289 | 0.464365  |
| C  | 5.352523  | -3.168929 | 0.294124  |
| O  | 6.453161  | -3.533025 | 0.470673  |
| Zn | -0.171427 | 0.630442  | 0.123998  |
| Au | 1.157693  | -1.533264 | -0.342358 |
| Au | -1.434705 | -1.310359 | -1.056517 |
| Au | -3.279894 | 0.845573  | -0.748417 |
| Au | 1.031786  | 2.700261  | 1.320260  |
| Au | 2.675100  | 0.445473  | 0.917046  |
| Au | -0.133776 | 5.011845  | 1.892165  |
| Au | -1.574142 | 2.841045  | 0.592325  |
| Au | 3.851952  | -1.867079 | 0.358807  |
| Au | -4.071985 | -1.484332 | -1.967940 |
